# Supplementary material for: Highly stable and luminescent formamidinium-based perovskite nanocrystal probe for temperature and mercury sensors and in vitro imaging in live cells
Source: Royal Society of Chemistry journal article supplement (doi:10.1039/d4tc02282c), 2024-01-01
Supplement: d4tc02282c1.pdf [file d4tc02282c1.pdf]

## **Supporting Information**

### **Highly Stable and Luminescent Formamidinium-Based Perovskite Nanocrystals'**

### **Probe for Temperature and Mercury Sensors and *In-vitro* Imaging in Live Cells**

*Kajol Sahoo*<sup>1</sup>, *Satish Kumar*<sup>2,3</sup>, *Ashutosh Mohapatra*<sup>1</sup>, *Nishant Kumar Dubey*<sup>2,3</sup>, *Ramakanta Naik*

<sup>1</sup>, *Chandan Goswami*<sup>2,3</sup>, *Saikat Bhaumik*<sup>1,4,\*</sup>

#### **1. Characterization techniques and sample preparations:**

**1.1. UV-VIS absorption and photoluminescence (PL) measurements:** UV-VIS spectrophotometer UV-1900i SHIMADZU was used to record the UV-Vis absorption spectra. Ocean Insight Maya 2000 Pro high-sensitivity spectrometer was used to record the PL spectra using the excitation wavelength of  $\lambda_{\text{ex}} = 370$  nm for all the samples. These synthesized FA-Cs10@O, FA-Cs10@O@P, FA-Cs10@S, and FA-Cs10@S@P NCs were diluted in toluene. Further, they were transported to a quartz cuvette for the measurements.

**1.2. Powder X-ray diffraction (PXRD):** The concentrated NCs dispersed in toluene were drop casted on the well-cleaned glass substrate (1x1 cm). Bruker D8 diffractometer was used to measure the PXRD with Cu-K $_{\alpha}$  ( $\lambda = 1.54$  Å) as incident radiation at 40 kV and 30 mA power. PANalytical Expert's high score plus software was used to analyse the XRD data.

**1.3. Transmission electron microscopy (TEM) images:** All the samples in toluene with an optimum solution concentration were dropped on the carbon-coated Cu grids with 200 mesh. Jeol-JEM-2100 PLUS microscope was used to measure the TEM operated at 200 kV.

**1.4. Fourier transform infrared spectroscopy (FTIR) measurement:** A few microliters of concentrated NCs solutions were placed on the ATR-FTIR attenuated total reflection mode.

Bruker Alpha-T spectrometer was used to measure the FTIR spectra after the evaporation of the solvent.

**1.5. X-ray photoelectron spectroscopic measurement (XPS):** The XPS analysis was carried out using XPS Analytical Facility (XPS Lab), Department of Chemical Engineering, ICT-Mumbai. The NCs thin film was prepared and exposed to a beam of X-rays, which excites the atoms on the surface of the sample.

**1.6. Stability tests in polar solvent, heat stability, ion migration, and ion-detection measurements:** The stability tests of all the NCs in terms of polar solvent, ion migration, heat treatment and the selectivity as well as the sensitivity of the NCs towards the  $\text{Hg}^{2+}$ -ion detection was carried out by using Ocean insight Maya 2000 Pro high-sensitivity spectrometer with a 370 nm UV excitation source. All the stability tests were done in open-air atmospheric room conditions with 55- 65% humidity.

**1.7. Preparation of TBA-Cl precursor solution:** The TBA-Cl stock precursor solution of 0.19 mmol was prepared by dissolving 55 mg of TBA-Cl in 1 mL of toluene followed by sonication until complete dissolution of the solute. Further, we diluted the solution by taking 10  $\mu\text{L}$  from stock solution in 0.5 mL of toluene and used it for our measurements.

**2. Table S1:** Comparative study for detection of mercury ions in presence of different fluorescent probes.

| Name of Fluorescent probes     | Linear range                         | Detection limit     | Reference |
|--------------------------------|--------------------------------------|---------------------|-----------|
| A thio-urea based Chemo sensor | 10 $\mu\text{M}$ – 100 $\mu\text{M}$ | 11.14 $\mu\text{M}$ | 1         |
| N-GQDs                         | 2.5-800 $\mu\text{M}$                | 2.5 $\mu\text{M}$   | 2         |
| M-CDs                          | 0-1200 $\mu\text{M}$                 | 5.6 $\mu\text{M}$   | 3         |
| N, S-CDs                       | 5 $\mu\text{M}$ – 50 $\mu\text{M}$   | 1.78 $\mu\text{M}$  | 4         |
| FA-Cs10@S@P NCs                | 0 $\mu\text{M}$ – 15.4 $\mu\text{M}$ | 1.13 $\mu\text{M}$  | This Work |

**3. Figures:**

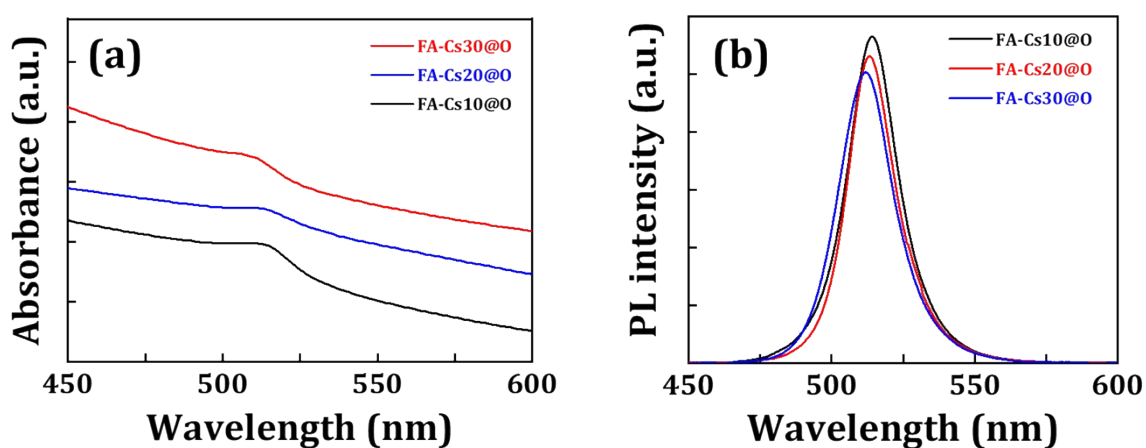

**Figure S1:** (a) UV-VIS and (b) PL spectra of different Cs-doped FAPbBr<sub>3</sub> NCs as represented in legends.

**3.1. Figure S1:**

**3.2. Figure S2:**

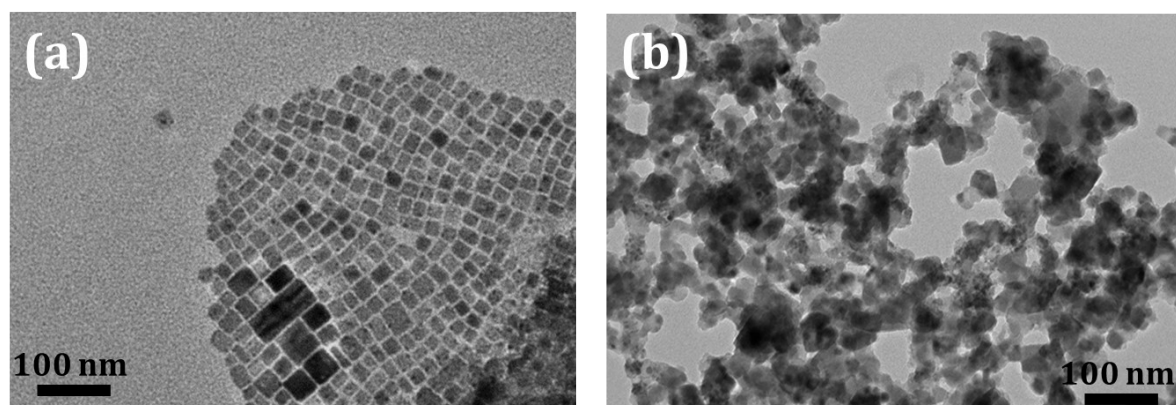

**Figure S2:** TEM images of (a) FA-Cs10@O@P NCs and (b) FA-Cs10@S@P NCs.

**3.3. Figure S3:**

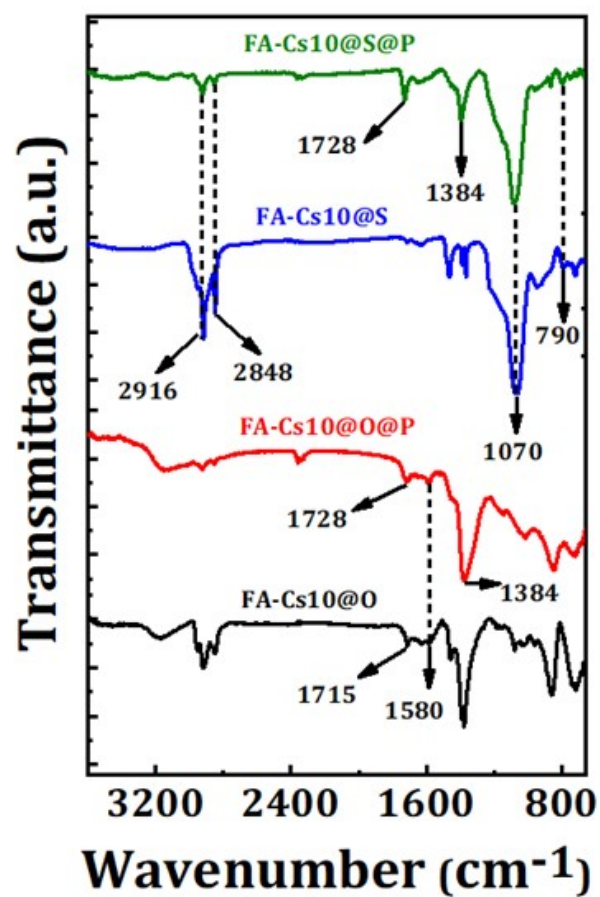

**Figure S3:** FTIR spectra of FA-Cs10@O (black line), FA-Cs10@O@P (red line), FA-Cs10@S (blue line), and FA-Cs10@S@P (green line) NCs.

### 3.4. Figure S4:

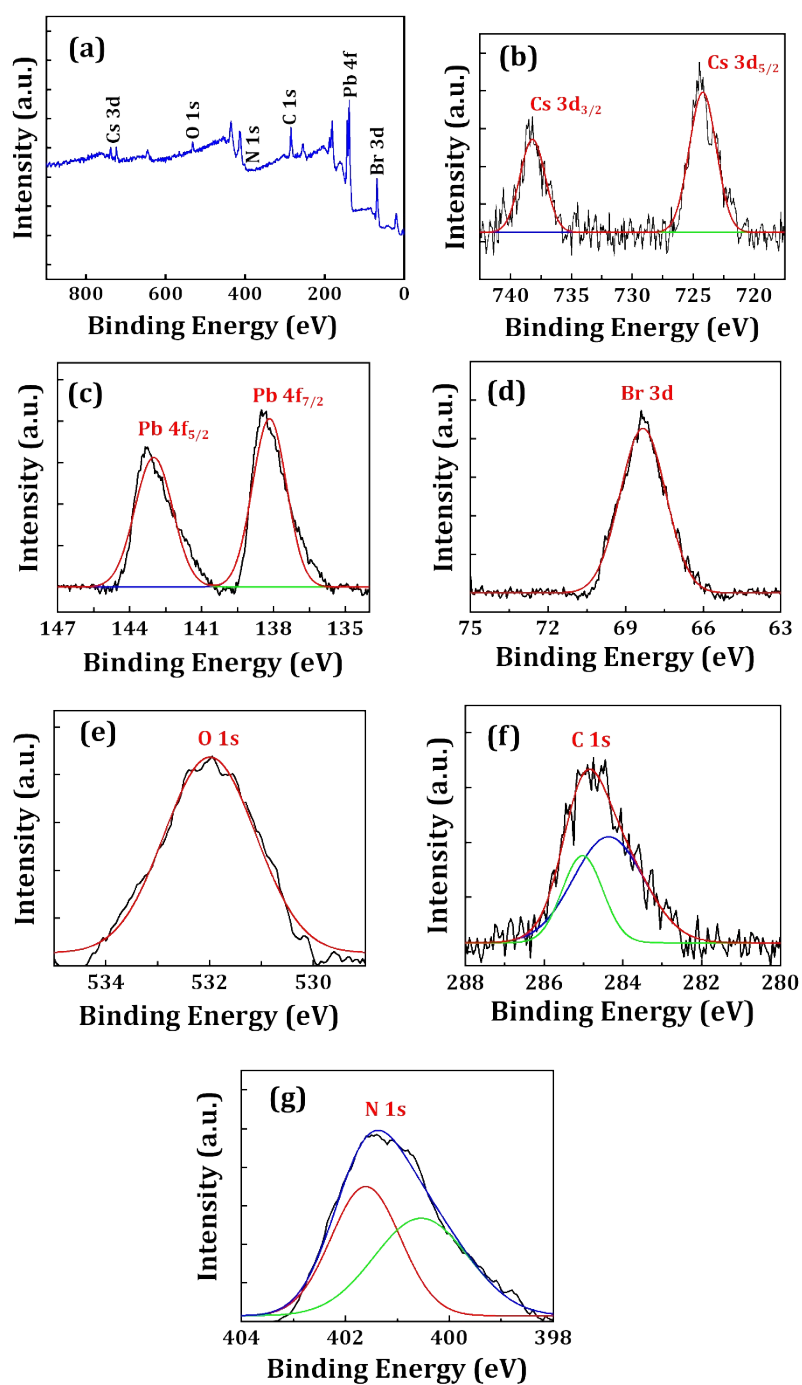

**Figure S4:** (a) Core XPS spectrum and HR-XPS spectra of (b) Cs 3d, (c) Pb 4f, (d) Br 3d, (e) O 1s, (f) C 1s, and (g) N 1s chemical states of FA-Cs10@O NCs.

### 3.5. Figure S5:

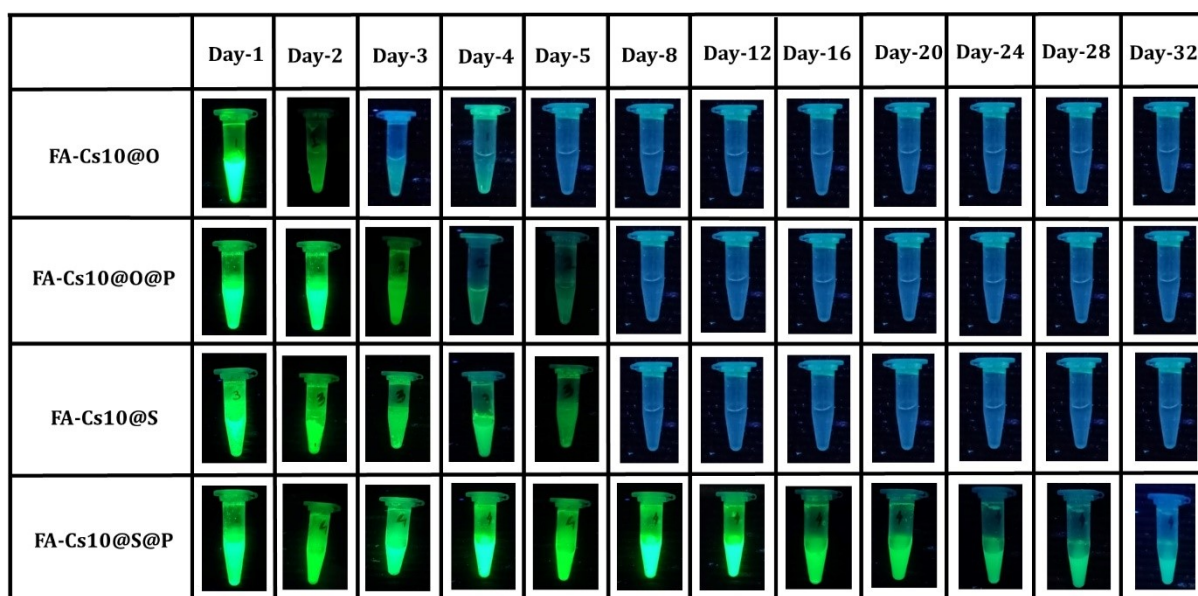

**Figure S5:** Photographic images of all the NCs dispersion in water for a period of 1 month while placed under a 370 nm UV lamp.

### 3.6. Figure S6:

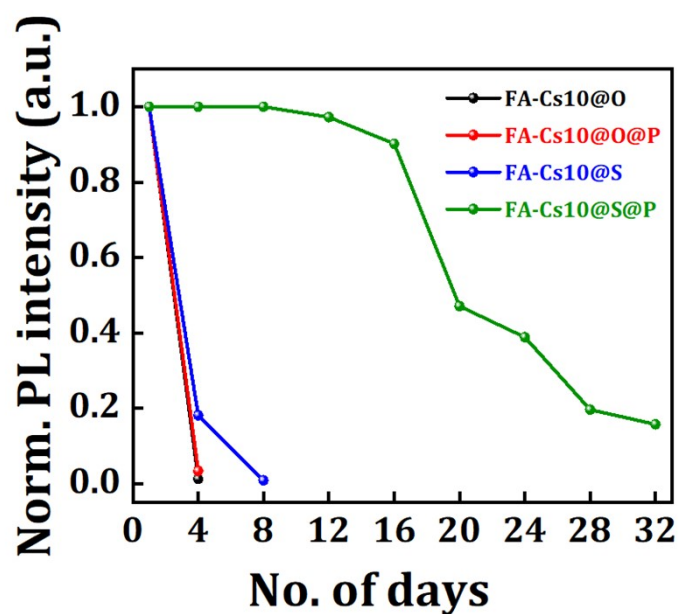

**Figure S6:** Change in PL intensity of all the NCs dispersed in water with respect to the number of days as represented in legend.

2.7. Figure S7:

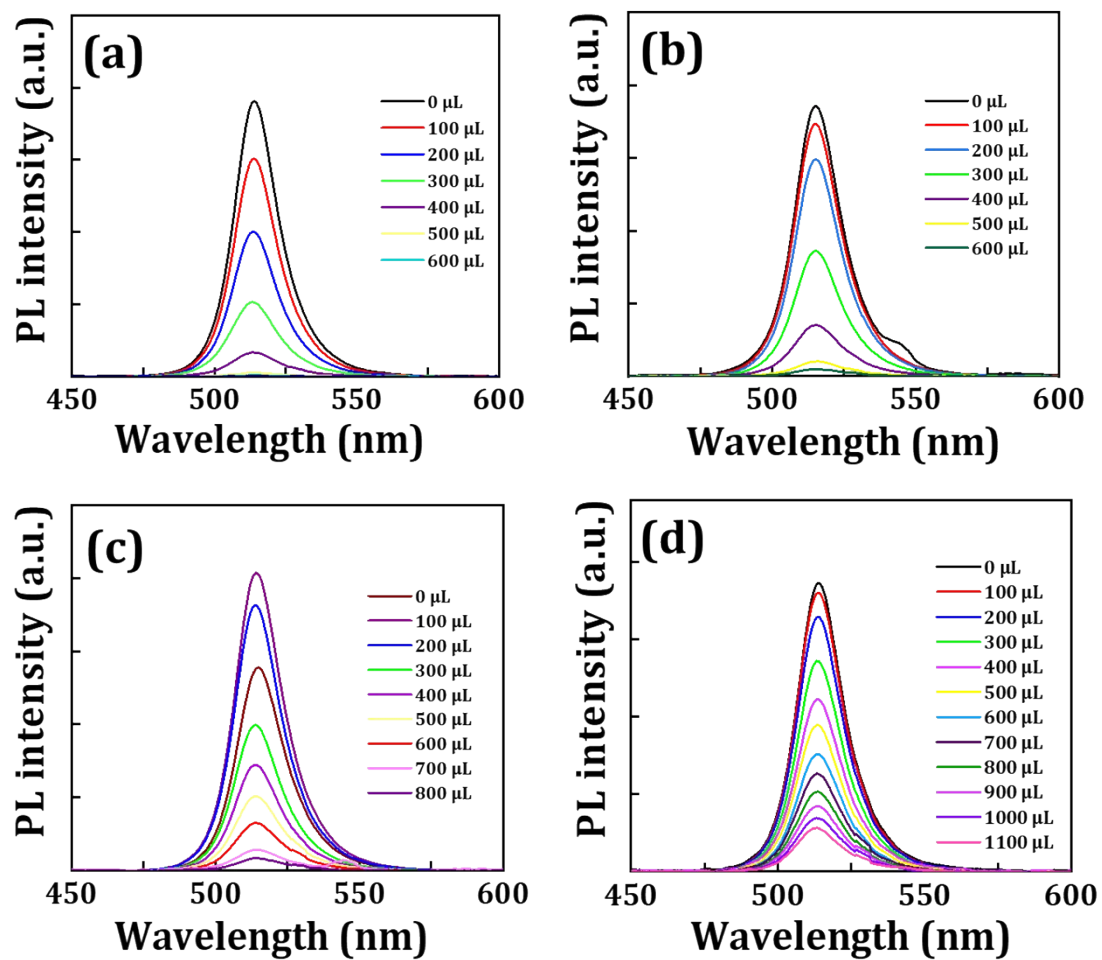

**Figure S7:** Change in PL spectra of (a) FA-Cs10@O, (b) FA-Cs10@O@P, (c) FA-Cs10@S, (d) FA-Cs10@S@P NCs with addition of different amount of DI water.

2.8. Figure S8:

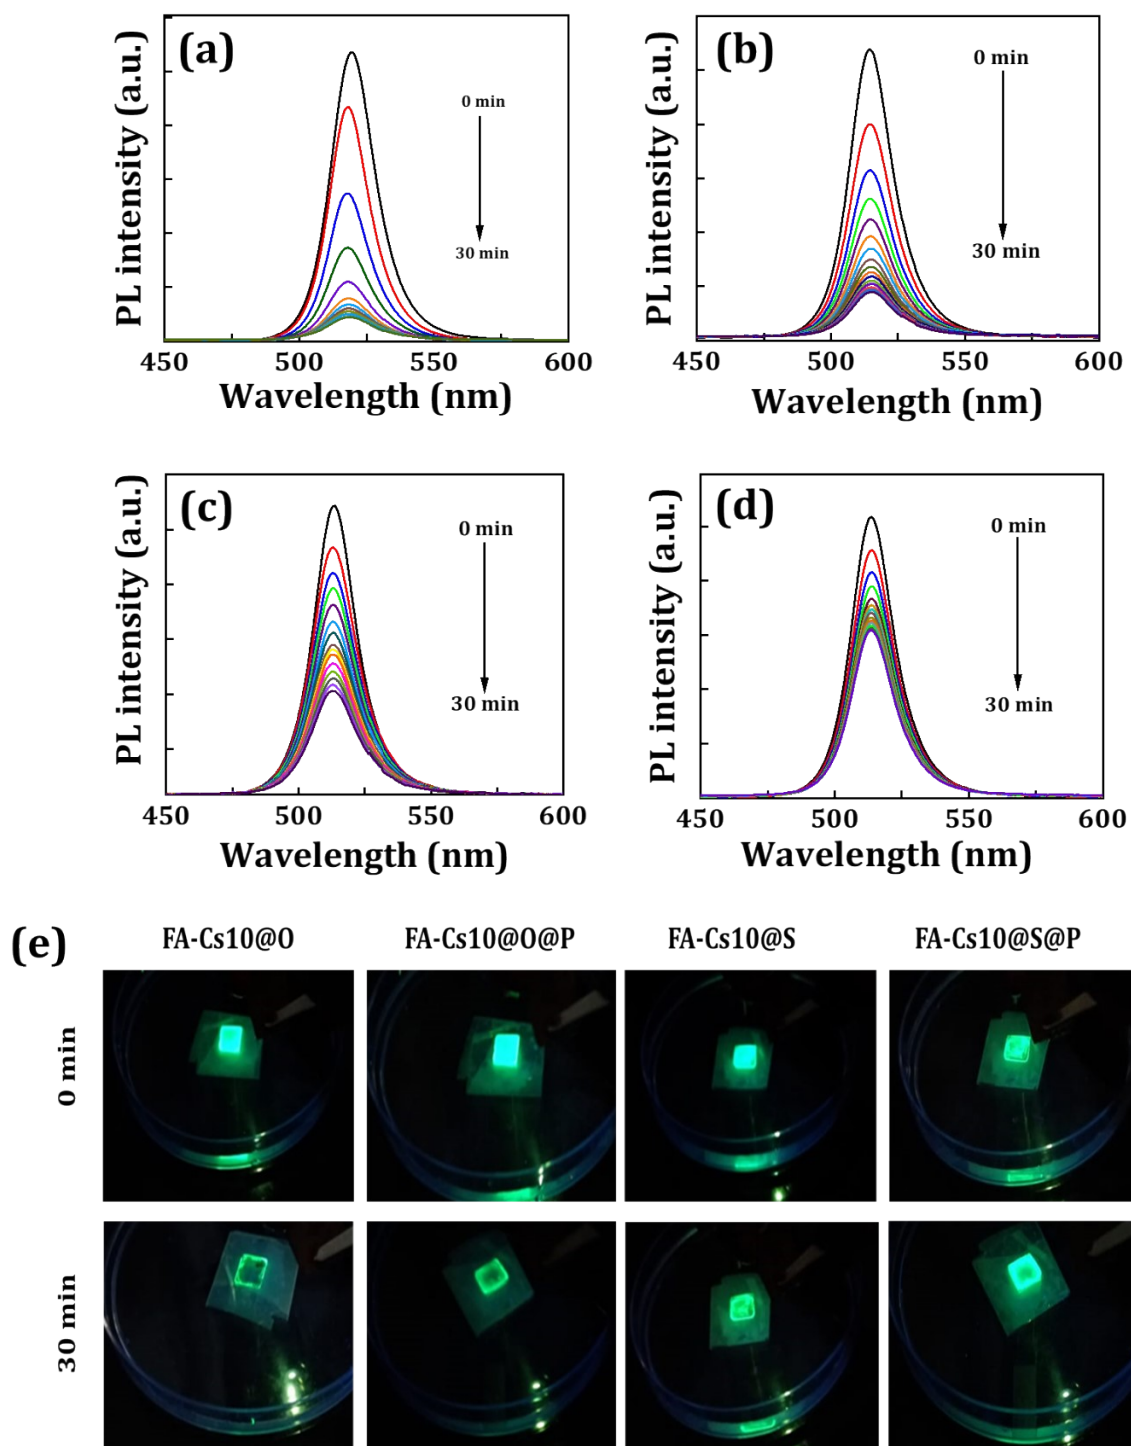

**Figure S8:** Variations of PL intensities of (a) FA-Cs10@O, (b) FA-Cs10@O@P, (c) FA-Cs10@S, (d) FA-Cs10@S@P NCs' films dipped in water. (e) Photographic images of all these NCs' films in water and placed under a 370 nm UV lamp.

2.9. Figure S9:

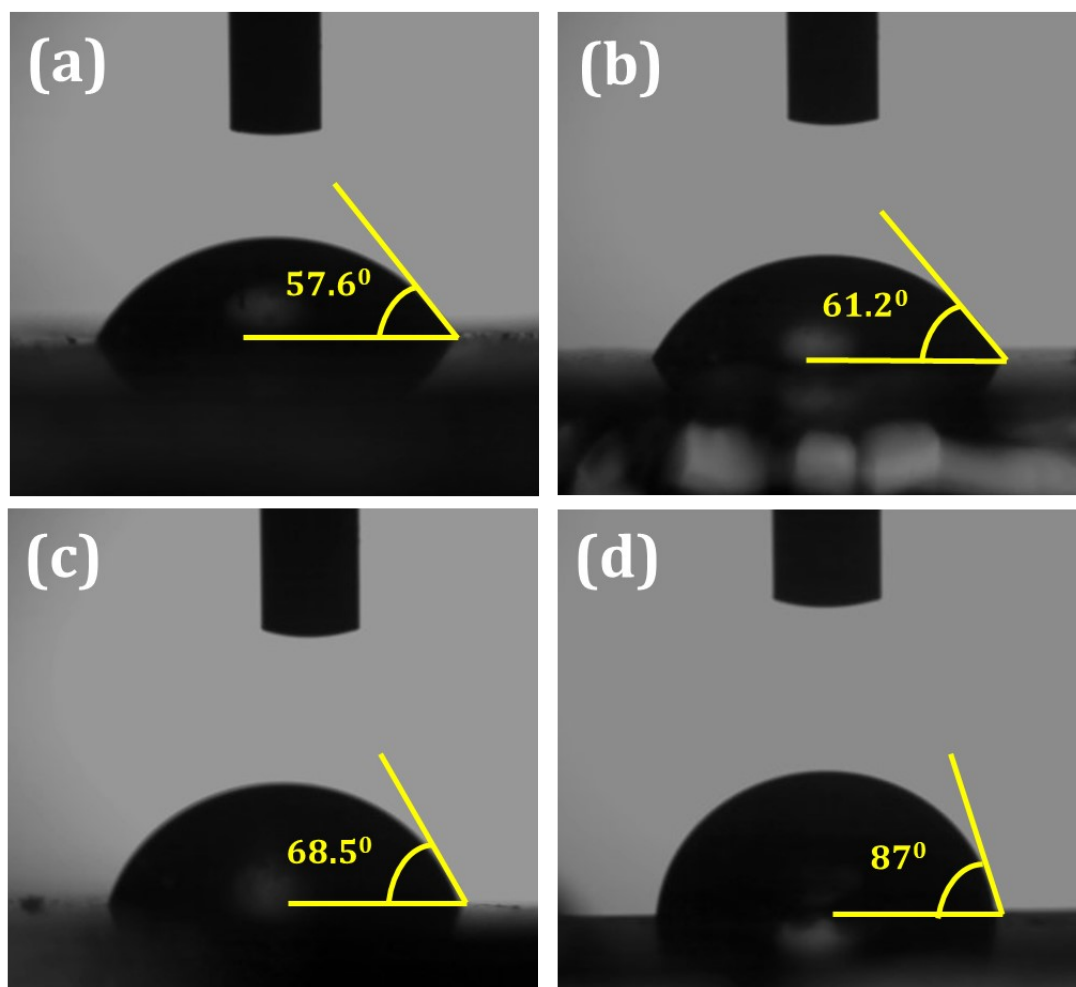

**Figure S9:** Contact angle measurement of (a) FA-Cs10@O, (b) FA-Cs10@O@P, (c) FA-Cs10@S, (d) FA-Cs10@S@P NCs' films.

2.10. Figure S10:

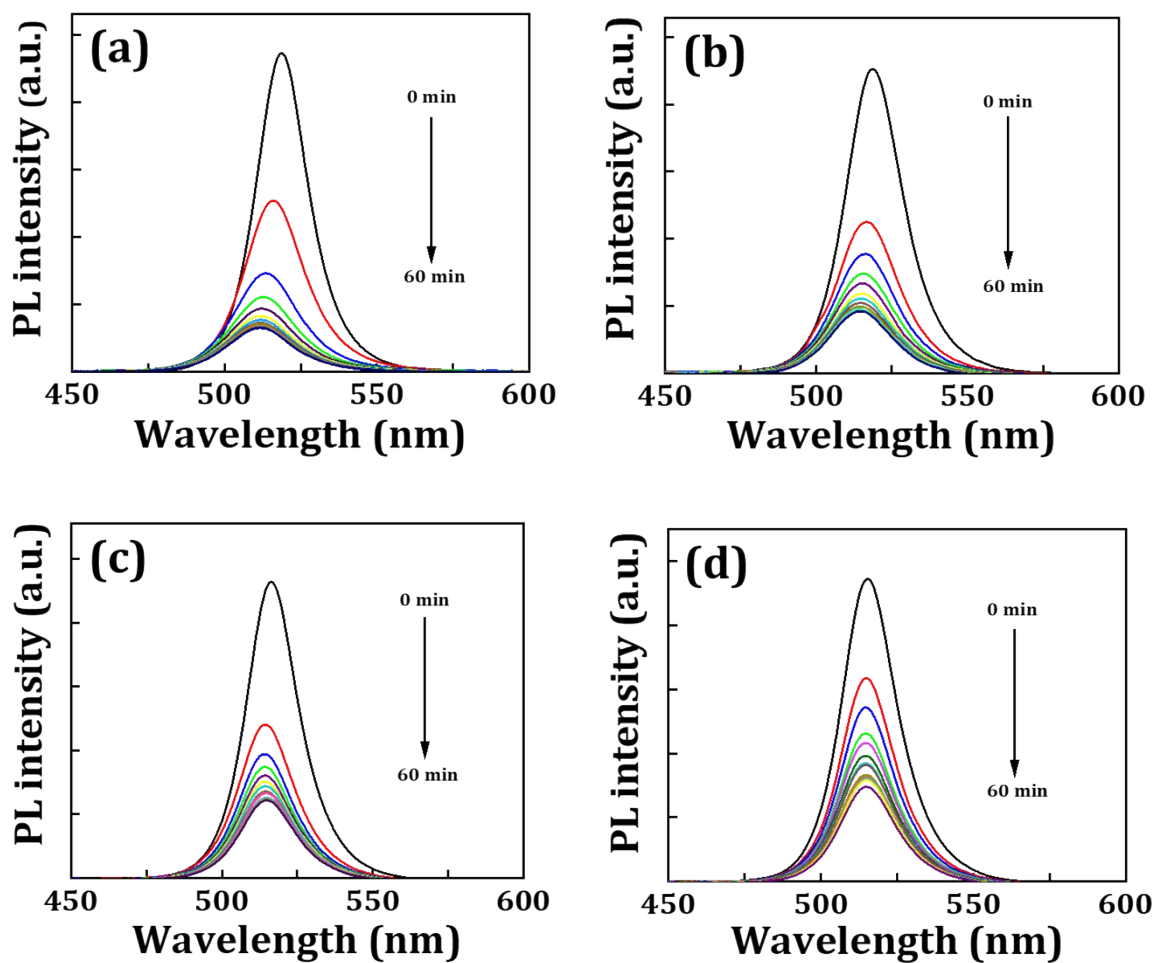

**Figure S10:** Variations of PL intensities of (a) FA-Cs10@O, (b) FA-Cs10@O@P, (c) FA-Cs10@S, (d) FA-Cs10@S@P NCs' films while kept on a hotplate at 80 °C.

2.11. Figure S11:

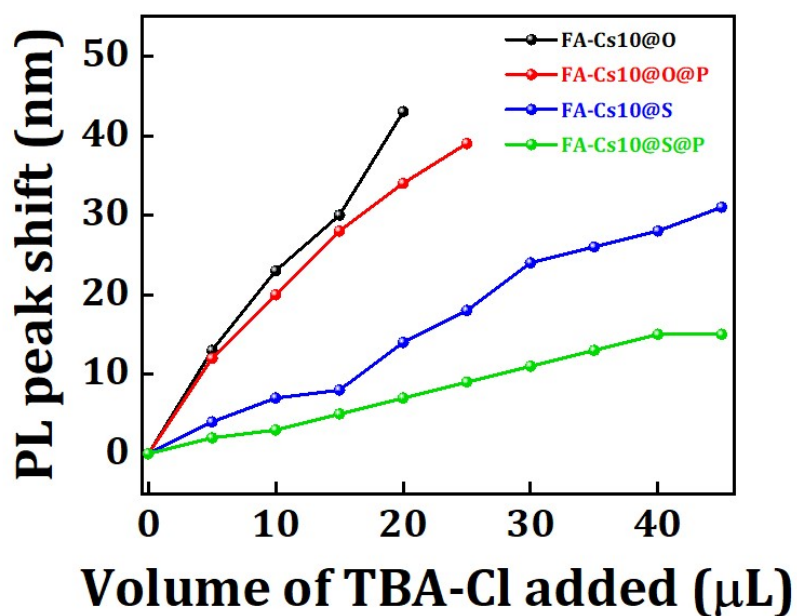

**Figure S11:** Change in PL peak position of all the NCs' solutions in toluene with the addition of different amounts of TBA-Cl precursor solutions as shown in legend.

2.12. Figure S12:

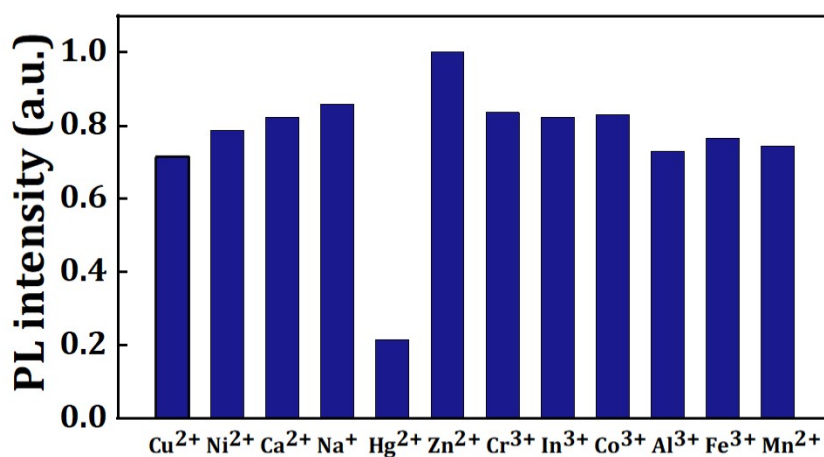

**Figure S12:** Histogram of the change in PL intensity of FA-Cs10@S@P NCs after adding different metal ions.

2.13. Figure S13:

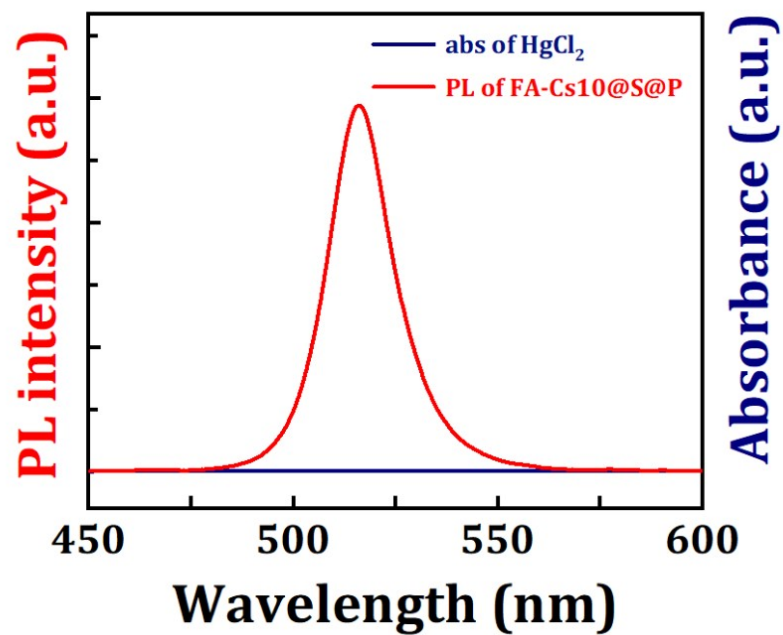

**Figure S13:** PL spectrum of FA-Cs10@S@P NCs solution (red line) and absorption spectrum of  $\text{HgCl}_2$  solution (blue line).

2.14. Figure S14:

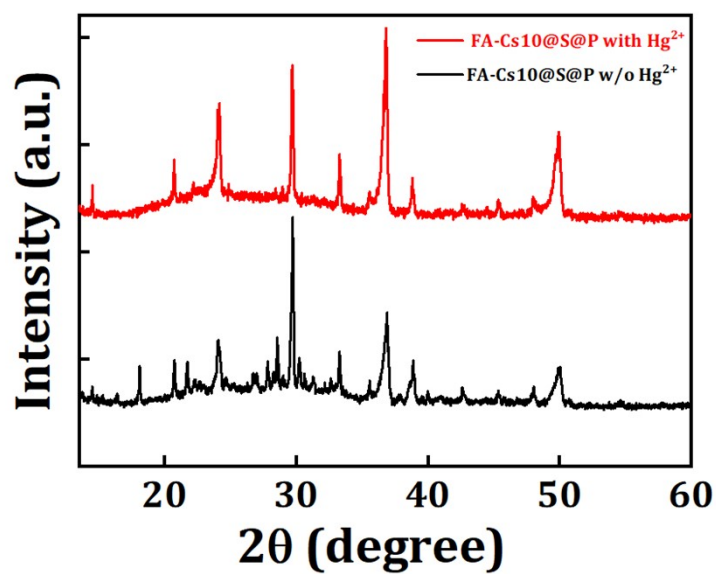

**Figure S14:** XRD pattern of FA-Cs10@S@P NCs in the absence and presence of  $\text{Hg}^{2+}$ -ions as shown in legend.

## 2.15. Figure S15:

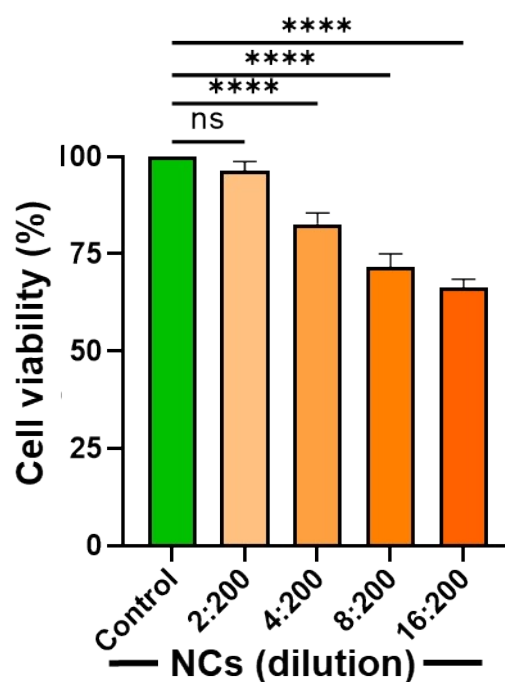

**Figure S15:** Cytotoxicity assessments of FA-Cs10@S@P NCs by MTT assay. 3T3L-1 cells were exposed to different dilutions (2:200, 4:200, 8:200, and 16:200) of NCs for 24 hours and cell viability was analyzed. The data are reported as percentage survival of the untreated cells. Cells exposed to 2:200 dilutions of NCs exhibits non-cytotoxic behavior. Each bar represents Mean with standard deviation (n=6). Statistical significance was calculated in GraphPad Prism9 using Oneway ANOVA test,  $P < 0.0001$  shown as \*\*\*\* and  $P > 0.1$  as ns (non-significant).

## References:

1. A. K. Manna, J. Mondal, R. Chandra, K. Rout and G. K. Patra, *Journal of Photochemistry and Photobiology A: Chemistry*, 2018, **356**, 477-488.
2. Y. Liu, X. Tang, M. Deng, Y. Cao, Y. Li, H. Zheng, F. Li, F. Yan, T. Lan and L. Shi, *Microchimica Acta*, 2019, **186**, 1-8.
3. P. Zhu, S.-L. Hou, Z. Liu, Y. Zhou, P. J. J. Alvarez, W. Chen and T. Zhang, *Environmental Science & Technology*, 2024.
4. M. Pajewska-Szmyt, B. Buszewski and R. Gadzała-Kopciuch, *Materials chemistry and Physics*, 2020, **242**, 122484.
